# Supplementary material for: Canine Distemper Virus Alters Defense Responses in an Ex Vivo Model of Pulmonary Infection
Source: MDPI journal article supplement (doi:10.3390/v15040834), 2023-03-24
Supplement: s1 [file s1]

# Canine Distemper Virus Alters Defense Responses in an *Ex Vivo* Model of Pulmonary Infection

Elisa Chludzinski <sup>1,3</sup>, Małgorzata Ciurkiewicz <sup>1</sup>, Melanie Stoff <sup>1</sup>, Johanna Klemens <sup>1</sup>, Johannes Krüger <sup>1</sup>, Dai-Lun Shin<sup>2</sup>, Georg Herrler <sup>2,\*</sup>, Andreas Beineke <sup>1,3,\*,\*\*</sup>

<sup>1</sup> Department of Pathology, University of Veterinary Medicine Hannover, 30559 Hannover, Germany

<sup>2</sup> Institute of Virology, University of Veterinary Medicine Hannover, 30559 Hannover, Germany

<sup>3</sup> Center for Systems Neuroscience (ZSN), 30559 Hannover, Germany

\* Both authors have contributed equally last (G.H., A.B.)

\*\* Correspondence: andreas.beineke@tiho-hannover.de (A.B.)

## Supplementary Material:

This file includes: Supplementary Table S1, Supplementary Figure S1

**Supplementary Table S1:** Details of dogs used for precision-cut lung slices (PCLSs)

| Dog No | Age (years) | Sex | Breed                        |
|--------|-------------|-----|------------------------------|
| 1      | 13          | m   | Petit Basset Griffon Vendeen |
| 2      | 6.5         | mc  | Labrador                     |
| 3      | 18          | m   | mixed breed                  |
| 4      | 8           | f   | mixed breed                  |
| 5      | 12          | fs  | mixed breed                  |
| 6      | 11          | fs  | Australian Shepherd          |

m = male; mc = male castrated; f = female; fs = female spayed

## Supplementary Figure S1:

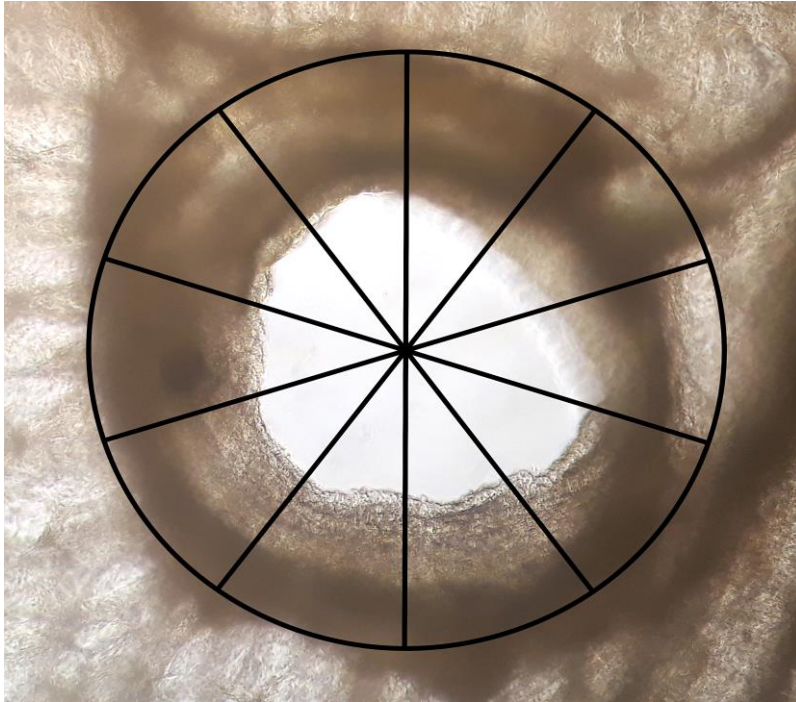

**Supplementary Figure S1:** Scheme for the evaluation of ciliary beating activity by light microscopy. To evaluate the percentage of ciliary beating activity, the bronchus is divided into ten equally-sized segments.
